# Supplementary material
Source: Springer Nature journal article supplement (https://www.springermedizin.de/resource/supplementary/13063_2010_457_MOESM1_ESM.pdf/9618254)
Supplement: MOESM1 [file 9618254]

People with dementia meeting inclusion criteria for CST groups.  
Screened and **Randomised (1<sup>st</sup> Stage)** into CST groups.  
Subtype of dementia identified

Commence CST groups

Alzheimers disease plus  
(1) currently on cholinesterase inhibitors (CHEIs) OR  
(2) willing and suitable for cholinesterase inhibitors

1) Non Alzheimers dementia  
OR 2) Alzheimers but unwilling or unsuitable to take cholinesterase inhibitors.

IF (1)  
Continue with CHEIs

IF (2) Contact local clinical team suggest suitability for CHEIs

clinical team starts CHEIs

clinical team does not start CHEIs

CST groups finish

**Randomisation (2<sup>nd</sup> Stage)** to either MCST plus CHEIs OR control plus CHEIs

**Randomisation (2<sup>nd</sup> Stage)** to either MCST OR control groups
